# Supplementary material
Source: Springer Nature journal article supplement (https://www.springermedizin.de/resource/supplementary/12875_2013_959_MOESM3_ESM.pdf/9435504)

Most recent SUA

1000  
800  
600  
400  
200  
0

100

200

300

400

500

600

Current daily dose (in last 2m)

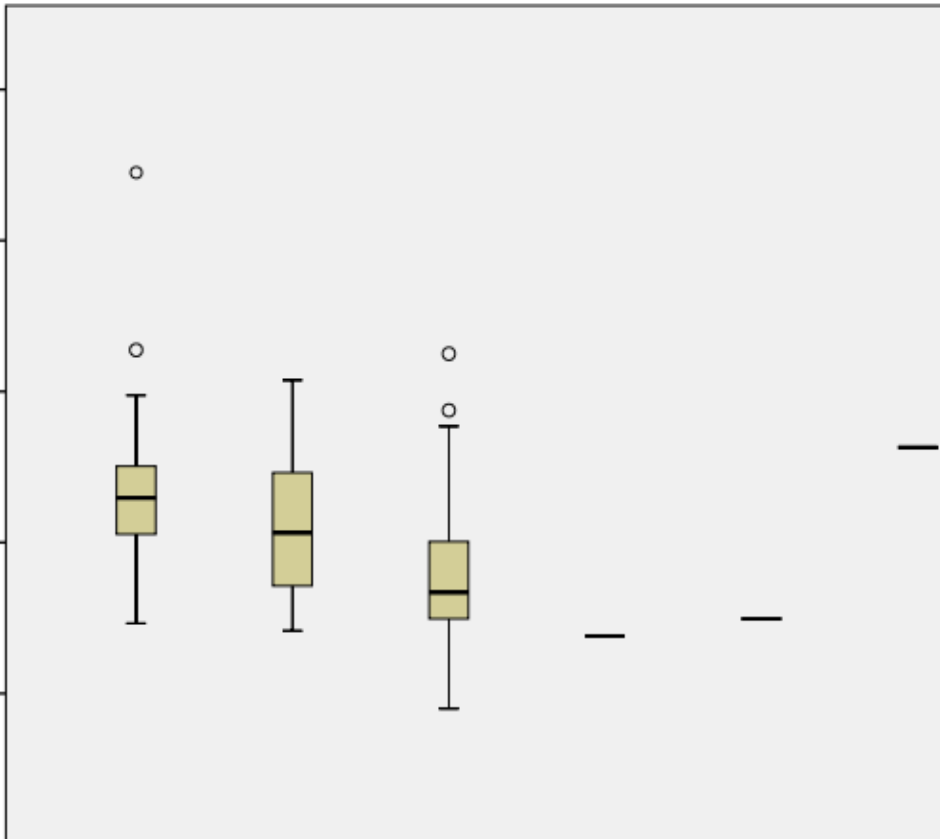

Supplement: MOESM3 [file 9435504]
